# Supplementary material for: Integrating Genetic Variants and Expression Profiles of Pharmacogenes in Treatment- Resistant Depression
Source: Research Square preprint supplement (doi:10.21203/rs.3.rs-7758521/v1), 2025-10-15
Supplement: Supplementary file 1 [file fb3cd06429b83e367c4453b1.xlsx]

## Sheet: Table S1
Supplementary Table 1. Socio-demographic and clinical features of the patients characterized as remitted after 8 weeks of treatment on the basis of MADRS assessment and stratified based on TRD
	Non-TRD n=113		TRD n=115
Socio-demographic and clinical features	Remitters N = 75	Non-Remitters N = 40	Remitters N = 56	Non-Remitters N = 57
Age in years, mean (SD)	44.2 (14.9)	47.0 (14.3)	55.3 (10.2)	55.5 (12.1)
Females, n (%F)	52 (69.3)	31 (77.5)	37 (66.1)	41 (71.9)
Smokers, n (%)	25 (38.5)	13 (34.2)	19 (33.9)	23 (40.4)
Body Mass Index (BMI), mean (SD)	23.9 (4.8)	23.6 (4.9)	25.2 (4.6)	24.5 (3.8)
Age of onset in years, mean (SD)	36.8 (14.9)	37.9 (12.7)	32.3 (15.0)	33.6 (12.7)
MADRS at recruitment	32.9 (3.9)	28.0 (5.3)	30.7 (8.1)	32.6 (6.1)
MADRS at 8 weeks	6.1 (2.3)	12.1 (1.9)	4.0 (3.1)	23.0 (9.8)
Comorbidity with anxiety disorders, n (%)	17 (22.7)	13 (32.5)	29 (51.8)	20 (35.1)
% administration of drugs metabolized by CYP2D6, n (%)	19 (25.3)	11 (27.5)	33 (58.9)	40 (70.2)
% administration of drugs metabolized by CYP2C19, n (%)	37 (49.3)	23 (57.5)	20 (35.7)	24 (42.1)

## Sheet: Table S2
Supplementary Table 2. Haplotype-inferred phenotype
CYP2D6 haplotypes	CYP2D6 phenotypes	CYP2C19 haplotypes	CYP2C19 phenotypes	CYP2B6 haplotypes	CYP2B6 phenotypes
*1/*3	Intermediate Metabolizer	*1/*2	Intermediate Metabolizer	*1/*6	Intermediate Metabolizer
*1/*4, *4/*10, *4/*39	Intermediate Metabolizer	*1/*8	Intermediate Metabolizer	*1/*7, *5/*6	Intermediate Metabolizer
*1/*5	Intermediate Metabolizer	*2/*17	Intermediate Metabolizer	*2/*6	Intermediate Metabolizer
*1/*6	Intermediate Metabolizer	*1/*1	Normal Metabolizer	*4/*6	Intermediate Metabolizer
*10/*41, *39/*69	Intermediate Metabolizer	*2/*2	Poor Metabolizer	*1/*1	Normal Metabolizer
*2/*4, *4/*10, *4/*39, *4/*65	Intermediate Metabolizer	*1/*17	Rapid Metabolizer	*1/*2	Normal Metabolizer
*2/*4x2, *2x2/*4, *4/*10x2, *4x2/*10, *4x2/*39, *4x2/*65	Intermediate Metabolizer	*17/*17	Ultrarapid Metabolizer	*1/*5	Normal Metabolizer
*2/*5	Intermediate Metabolizer			*2/*2	Normal Metabolizer
*2/*6, *6/*34	Intermediate Metabolizer			*2/*5	Normal Metabolizer
*3/*41	Intermediate Metabolizer			*5/*5	Normal Metabolizer
*4/*10	Intermediate Metabolizer			*6/*6	Poor Metabolizer
*4/*10, *4/*65	Intermediate Metabolizer			*1/*4	Rapid Metabolizer
*4/*41, *4/*69	Intermediate Metabolizer			*2/*4	Rapid Metabolizer
*4/*41x2, *4x2/*41, *4x2/*69	Intermediate Metabolizer			*4/*5	Rapid Metabolizer
*5/*10	Intermediate Metabolizer
*5/*41	Intermediate Metabolizer
*5/*41x2, *41/*41	Intermediate Metabolizer
*5/*9	Intermediate Metabolizer
*6/*41, *6/*91	Intermediate Metabolizer
*1/*4x2, *1x2/*4, *4/*10x2, *4x2/*10, *4x2/*39	Intermediate/Normal Metabolizer
*1/*1, *1x2/*5	Normal Metabolizer
*1/*10	Normal Metabolizer
*1/*17	Normal Metabolizer
*1/*2, *34/*39	Normal Metabolizer
*1/*41, *39/*91	Normal Metabolizer
*1/*41x2, *1x2/*41	Normal Metabolizer
*1/*9	Normal Metabolizer
*2/*10, *39/*65	Normal Metabolizer
*2/*10x2, *2x2/*10	Normal Metabolizer
*2/*2, *2x2/*5	Normal Metabolizer
*2/*41	Normal Metabolizer
*2/*41x2, *2x2/*41	Normal Metabolizer
*2/*9	Normal Metabolizer
*3/*4	Poor Metabolizer
*4/*4, *4x2/*5	Poor Metabolizer
*4/*4x2	Poor Metabolizer
*4/*5	Poor Metabolizer
*4/*6	Poor Metabolizer
*4/*6x2, *4x2/*6	Poor Metabolizer
*1/*1x2	Ultrarapid Metabolizer
*1/*2x2, *1x2/*2	Ultrarapid Metabolizer
*1x2/*2x2	Ultrarapid Metabolizer
*2/*2x2	Ultrarapid Metabolizer

## Sheet: Table S3
Supplementary Table 3. Association between pharnacogene metabolizer phenotypes and clinical variables
	CYP2D6		CYP2C19		CYP2B6
Socio-demographic and clinical features	Statistics	p-value	Statistics	p-value	Statistics	p-value
Whole sample
Age in years, mean (SD)	3.38	0.336	12.81	0.012	1.23	0.746
Females, n (%F)	3.2	0.36	3.71	0.446	5.43	0.143
Smokers, n (%)	5.08	0.66	2.91	0.573	4.95	0.175
Body Mass Index (BMI), mean (SD)	3.15	0.369	0.92	0.922	0.8	0.851
Age of onset in years, mean (SD)	2.16	0.539	5.88	0.208	1.5	0.682
Comorbidity with anxiety disorders	8.14	0.043	6.29	0.179	2.37	0.499
Non-TRD patients
Age in years, mean (SD)	5.74	0.125	5.58	0.233	0.3	0.96
Females, n (%F)	5.53	0.137	8.26	0.083	2.64	0.45
Smokers, n (%)	2.47	0.48	6.3	0.178	9.84	0.02
Body Mass Index (BMI)	2.05	0.563	1.74	0.784	0.65	0.886
Age of onset in years	2.27	0.519	4.16	0.385	1.7	0.638
Comorbidity with anxiety disorders	3.41	0.333	3.95	0.413	0.66	0.882
TRD patients
Age in years, mean (SD)	0.28	0.965	10.18	0.037	1.45	0.693
Females, n (%F)	3.72	0.293	0.9	0.925	5.65	0.13
Smokers, n (%)	3.92	0.27	0.74	0.946	5.46	0.141
Body Mass Index (BMI)	1.69	0.638	2.24	0.691	1.91	0.591
Age of onset in years	0.15	0.985	4.65	0.325	3.58	0.311
Comorbidity with anxiety disorders	5.54	0.136	8.57	0.073	3.47	0.325
Statistics columns report Kruskall-Wallis H (association between metabolizer phenotypes and quantitative variables) or Pearson’s chi-squared test (association between metabolizer phenotypes and categorical variables)

## Sheet: Table S4
Supplementary Table 4. Association between CYP2D6 phenotypes and TRD or extreme phenotypes of response
Phenotypes	c2	p-value
Association between CYP2D6 and TRD
PM vs NM	0.21	0.775
IM vs NM	0.92	0.389
UM vs NM	0.62	0.523
PM + IM vs NM	1.01	0.342
Association between CYP2D6 and extreme phenotypes of response
PM vs NM	0.12	1
IM vs NM	1.34	0.271
UM vs NM	1.81	0.496
PM + IM vs NM	1.36	0.283

## Sheet: Table S5
Supplementary Table 5. Association between CYP2D6 metabolizer phenotypes and TRD or extreme phenotypes of response in patients treated with antidepressants with CYP2D6 clinical annotations
Pharmacogene metabolizer phenotype	Non-TRD n=42	TRD n=96	c2	p-value	Non-TRD remitters	TRD non-remitters	c2	p-value
					N = 19	N = 40
CYP2D6 phenotypes (%)	PM = 7.1	PM = 4.2	1.54	0.674	PM = 5.6	PM = 5.0	2.65	0.449
	IM = 38.1	IM = 36.5			IM = 44.4	IM = 35.0
	NM = 50.0	NM = 57.3			NM = 44.4	NM = 60.0
	UM = 4.8	UM = 2.1			UM = 5.6	UM = 0.0

## Sheet: Table S6
Supplementary Table 6. Association between CYP2C19 phenotypes and TRD or extreme phenotypes of response
Phenotypes	c2	p-value
Association between CYP2C19 and TRD
PM vs NM	2.61	0.18
IM vs NM	6.07	0.019
RM vs NM	0.68	0.47
UM vs NM	0.77	0.56
PM + IM vs NM	7.6	0.007
RM + UM vs NM	0.32	0.58
Association between CYP2C19 and extreme phenotypes of response
PM vs NM	1.13	0.444
IM vs NM	9.84	0.002
RM vs NM	1.9	0.234
UM vs NM	1.45	0.384
PM + IM vs NM	9.48	0.004
RM + UM vs NM	0.67	0.5

## Sheet: Table S7
Supplementary Table 7. Association between CYP2C19 metabolizer phenotypes and TRD or extreme phenotypes of response in patients treated with antidepressants with CYP2C19 clinical annotations
Pharmacogene metabolizer phenotype	Non-TRD n=69	TRD n=56	c2	p-value	Non-TRD remitters n=37	TRD non-remitters n=24	c2	p-value
CYP2C19 phenotypes (%)	PM = 5.8	PM = 3.6	4.95	0.293	PM = 10.8	PM = 8.3	9.24	0.055
	IM = 30.4	IM = 21.4			IM = 35.1	IM = 16.7
	NM = 30.4	NM = 44.6			NM = 27.0	NM = 54.2
	RM = 31.9	RM = 25.0			RM = 27.0	RM = 12.5
	UM = 1.4	UR = 5.4			UM = 0.0	UR = 8.3

## Sheet: Table S8
Supplementary Table 8. Association between CYP2B6 phenotypes and TRD or extreme phenotypes of response
Phenotypes	c2	p-value
Association between CYP2B6 and TRD
PM vs NM	0.34	0.668
IM vs NM	3.42	0.084
UM vs NM	1.93	0.248
PM + IM vs NM	2.03	0.16
Association between CYP2B6 and extreme phenotypes of response
PM vs NM	2.21	0.254
IM vs NM	2.63	0.137
RM vs NM	4.91	0.055
PM + IM vs NM	1.16	0.367

## Sheet: Table S9
Supplementary Table 9. Association between CYP2D6 phenotypes and remission in patients stratified for TRD
Phenotypes	c2	p-value
Patients with non-TRD
PM vs NM	0.04	1
IM vs NM	1.22	0.312
UM vs NM	0.02	1
PM + IM vs NM	1.01	0.326
Patients with TRD
PM vs NM	0.06	1
IM vs NM	0.52	0.539
UM vs NM	4.76	0.045
PM + IM vs NM	0.54	0.551

## Sheet: Table 10
Supplementary Table 10. Association between CYP2C19 phenotypes and remission in patients stratified for TRD
Phenotypes	c2	p-value
Patients with non-TRD
PM vs NM	1.42	0.376
IM vs NM	5.48	0.036
RM vs NM	0.39	0.627
UM vs NM	0.04	1
PM + IM vs NM	5.99	0.022
RM + UM vs NM	0.4	0.631
Patients with TRD
PM vs NM	2.63	0.24
IM vs NM	0.19	0.789
RM vs NM	1.65	0.258
UM vs NM	0.31	0.712
PM + IM vs NM	0.84	0.444
RM + UM vs NM	0.8	0.402

[truncated: 1 more sheets: Table S11]
